# Supplementary material for: Visible-light photocatalysis on C-doped ZnO derived from polymer-assisted pyrolysis
Source: Royal Society of Chemistry journal article supplement (doi:10.1039/c4ra17227b), 2015-01-01
Supplement: c4ra17227b1.pdf [file c4ra17227b1.pdf]

## Supplementary Information

### Visible-light photocatalysis on C-doped ZnO derived from polymer-assisted pyrolysis

Ahmad S. Alshammari,<sup>a,b\*</sup> Lina Chi,<sup>b,c</sup> Xiaoping Chen,<sup>b,c</sup> Abdulaziz Bagabas,<sup>a</sup> Nazanin Rashidi-Alavijeh,<sup>d</sup> Denis Kramer,<sup>b</sup> Abdulaziz Alromaeh,<sup>a</sup> Zheng Jiang<sup>b\*</sup>

<sup>a</sup> National Nanotechnology Research Center, King Abdulaziz City for Science and Technology, King Abdullah Road, P.O. Box 6086, Riyadh 11442, Saudi Arabia. Tel: 966 (0)11 481 4285; E-mail: [aalshammari@kacst.edu.sa](mailto:aalshammari@kacst.edu.sa)

<sup>b</sup> Faculty of Engineering and the Environment, University of Southampton, Southampton, SO17 1BJ, UK. Tel: 44 (0)23 80594893; E-mail: [z.jiang@soton.ac.uk](mailto:z.jiang@soton.ac.uk)

<sup>c</sup> School of Environmental Science and Engineering, Shanghai Jiao Tong University, Shanghai, 200240, China

<sup>d</sup> Department of Chemistry, Inorganic Chemistry Laboratory, University of Oxford, Oxford OX1 3QR, UK

#### Element PDOS of Wurtzite ZnO crystal:

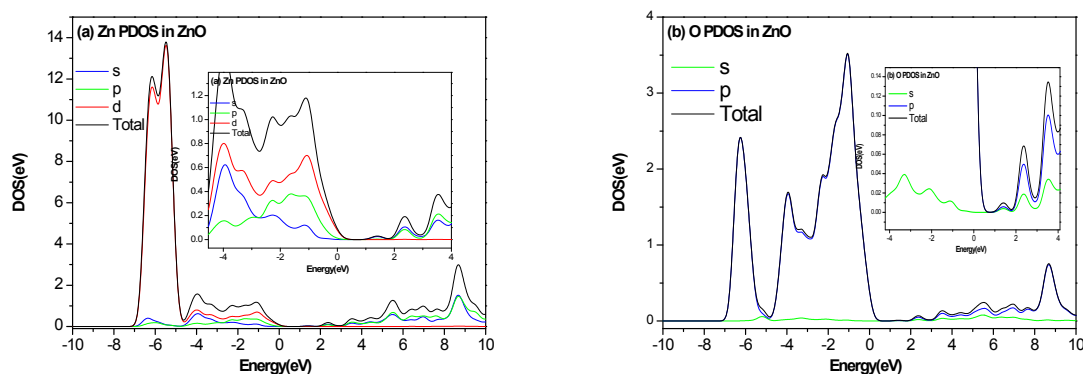

Fig.S1 PDOS of (a)Zn and (b) O in ZnO Wurtzite crystal. Insets correspond to amplified PDOS

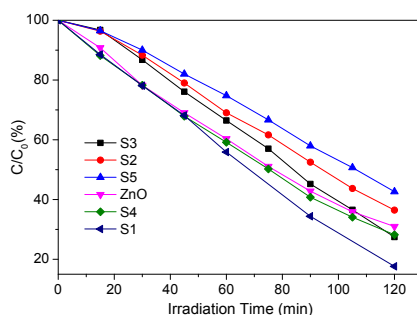

Fig.S2 Methylene Blue Photodegradation over ZnO and C-doped ZnO with different C-doping levels

#### Note:

The samples S1, S2, S3, S4 and S5 (heavy C-doped ZnO used in this paper) corresponded to F127 weight were 0.15, 0.35, 0.5, 0.6 and 0.75 grams respectively. It clearly showed only the trace amount of C-dopant may promote the visible-responsive photodegradation activity of the series of C-doped ZnO. Significantly reduced photoactivity was observed on the heaviest doped ZnO in this research which was adopted for this article to discuss decreased dye-sensitisation by heavy C-doping effects.
